# Supplementary material for: Proteomic Analysis of Virulence Profiles in Clinical Strains of Shigella flexneri in Manaus – Amazon State
Source: Research Square preprint supplement (doi:10.21203/rs.3.rs-358446/v1), 2021-03-30
Supplement: Supplementary file 1 [file 36138c9f9c9d2d56d36126ee.docx]

Additional file 1:

Table S1**.** Total amount of proteins recorded in the different databases for each tested condition.

| **Organism** | **LB total proteins (in Uniprot)** | **LB total protein (gene name)** | **LB total protein (annotated in STRING)** | **CR total proteins (in Uniprot)** | **CR total protein (gene name)** | **CR total protein (annotated in STRING)** |
| --- | --- | --- | --- | --- | --- | --- |
| *S.flexneri* M90T | 470 | 299 | 149 | 383 | 249 | 134 |
| *S. flexneri* strain 201 | 386 | 260 | 153 | 189 | 136 | 75 |
